# Supplementary material
Source: Research Square preprint supplement (doi:10.21203/rs.3.rs-9951838/v1)
Supplement: Supplementary file 1 [file 0019d8a244b4dc9af7276b86.pdf]

# Supplementary Materials

Urinary tract infections during inpatient spinal cord injury rehabilitation: a 12-year retrospective cohort

Or, Strauss, Baharav, Bondi

This file contains: Supplementary Tables S1–S2 and Supplementary Figures S1–S2. The STROBE checklist is submitted separately as a related manuscript file.

## Supplementary Table S1. Summary of monthly UTI incidence over the study period.

Note: Detailed month-by-month UTI incidence rates underlying this table and Supplementary Figure S1 are derived directly from the institutional analysis dataset ( $n = 147$  monthly observations, January 2012 – March 2024). Annual mean rates were derived from the same data. Numerical values for each calendar month are presented graphically in Supplementary Figure S1; a tabular month-by-month listing has been prepared by the authors and is available from the corresponding author on reasonable request.

| Statistic                                                          | Value (UTI events per 1,000 person-days) |
|--------------------------------------------------------------------|------------------------------------------|
| Number of monthly observations                                     | 147                                      |
| Cohort-level incidence rate (total events / total person-days)     | 8.80                                     |
| Mean of monthly incidence rates                                    | 9.01                                     |
| Range of monthly incidence rates                                   | 0.0 to 19.9                              |
| Approximate annual mean, 2012–2019                                 | 7 to 8                                   |
| Approximate annual mean, 2020–2023                                 | 10 to 15                                 |
| Goodness-of-fit (constant-rate Poisson, residual-deviance test), P | 0.69                                     |

## Supplementary Table S2. Summary of monthly systemic UTI incidence over the study period.

Note: "Systemic UTI" (previously "upper UTI" in the prior literature) refers to UTI episodes meeting systemic-feature criteria (fever  $\geq 38^\circ\text{C}$ , leukocytosis, elevated CRP, positive blood culture, or an antibiotic prescribed with an explicit upper-UTI indication such as pyelonephritis). Detailed month-by-month rates underlying this table and Supplementary Figure S2 are derived from the institutional analysis dataset and are presented graphically in Supplementary Figure S2; a tabular month-by-month listing is available from the corresponding author on reasonable request.

| Statistic                                                          | Value (Systemic UTI events per 1,000 person-days) |
|--------------------------------------------------------------------|---------------------------------------------------|
| Number of monthly observations                                     | 147                                               |
| Cohort-level incidence rate                                        | 5.79                                              |
| Mean of monthly incidence rates                                    | 5.97                                              |
| Range of monthly incidence rates                                   | 0.0 to 19.9                                       |
| Goodness-of-fit (constant-rate Poisson, residual-deviance test), P | 0.24                                              |

## Supplementary Figure S1. Monthly UTI incidence rate, 2012–2024.

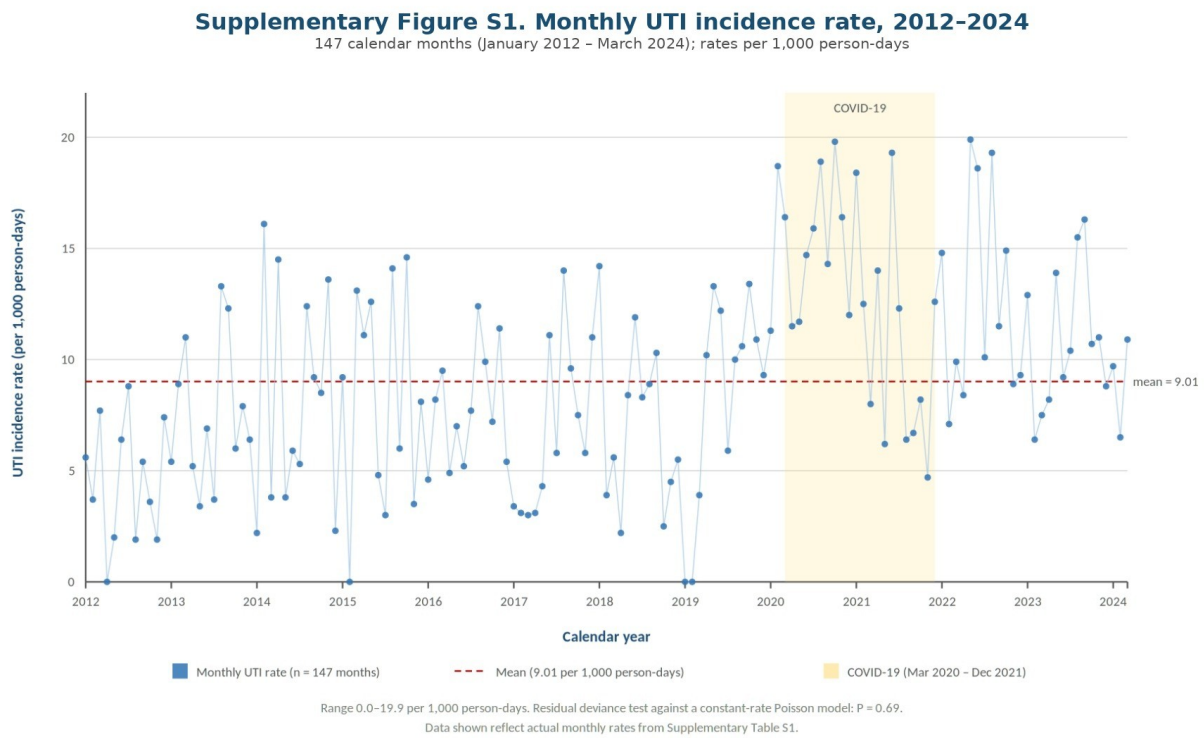

Monthly UTI incidence rate per 1,000 person-days, January 2012 – March 2024. Solid line: monthly incidence rate; shaded region: COVID-19 period (March 2020 – December 2021). The visual upward shift coincident with the COVID-19 period is discussed in the main text and addressed as a limitation.

## Supplementary Figure S2. Monthly systemic UTI incidence rate, 2012-2024.

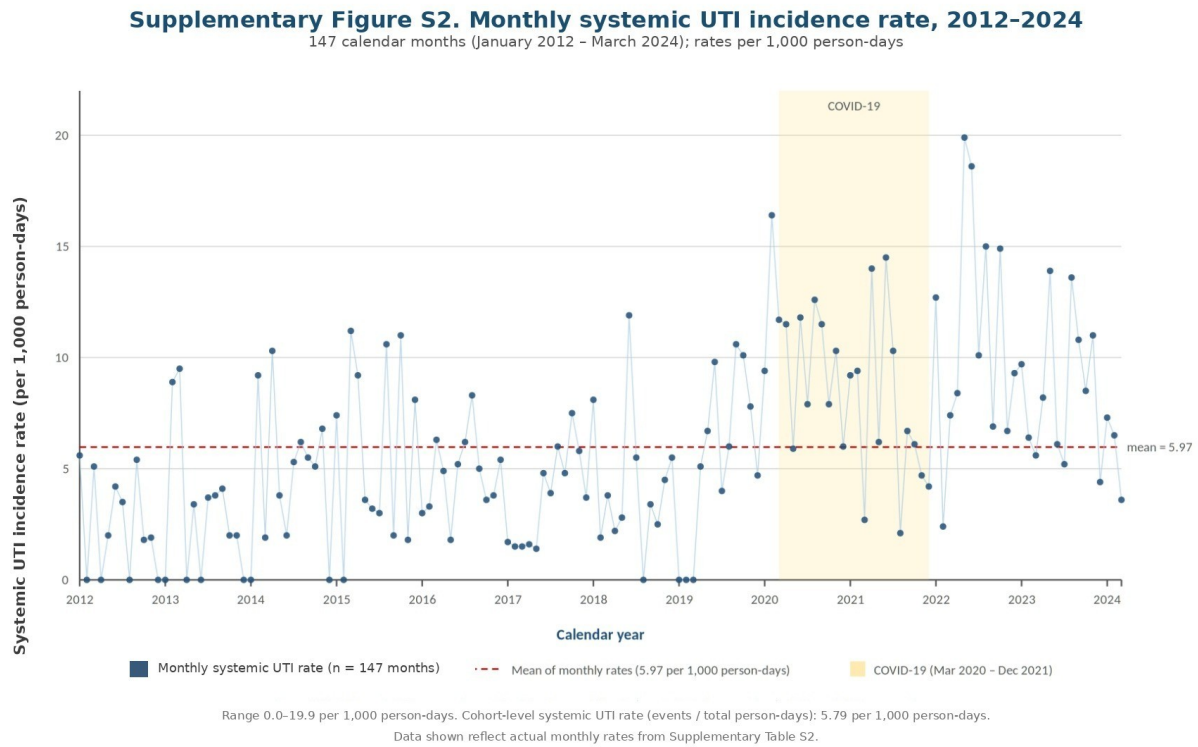

Monthly systemic UTI incidence rate ("UTI episodes meeting systemic-feature criteria"; previously termed "upper UTI" in the prior literature) per 1,000 person-days, January 2012 – March 2024. Operational definition: pyuria-defined episode plus  $\geq 1$  of fever  $\geq 38^\circ\text{C}$ , leukocytosis, elevated CRP, positive blood culture, or an antibiotic prescribed with an explicit upper-UTI indication (e.g., pyelonephritis). Definitional sensitivity is addressed in the main-text Discussion.
