# Supplementary material
Source: Research Square preprint supplement (doi:10.21203/rs.3.rs-9951838/v1)
Supplement: Supplementary file 2 [file 7aa09a3edbcbd97591e56d13.docx]

**STROBE Statement — Checklist for Cohort Studies**

*Urinary tract infections during inpatient spinal cord injury rehabilitation: a 12-year retrospective cohort*

*This standalone STROBE checklist (Strengthening the Reporting of Observational Studies in Epidemiology) accompanies the manuscript as a related manuscript file. Page numbers refer to the main manuscript file (continuous numbering). For brevity, item descriptions are paraphrased from the official STROBE statement (www.strobe-statement.org).*

| **Section / Topic** | **Item #** | **Recommendation** | **Reported on (page / section)** |
| --- | --- | --- | --- |
| **Title and abstract** | | | |
| Title and abstract | **1** | (a) Indicate the study’s design with a commonly used term in the title or the abstract | Title contains "12-year retrospective cohort"; Abstract Study Design: "Retrospective cohort study". Page 3. |
|  |  | (b) Provide in the abstract an informative and balanced summary of what was done and what was found | Structured abstract with Study Design, Objectives, Setting, Methods, Results, Conclusions, Sponsorship (≤250 words). Page 3. |
| **Introduction** | | | |
| Introduction | **2** | Background/rationale: Explain the scientific background and rationale for the investigation being reported | Introduction summarises UTI prevalence/burden after SCI, recognised risk factors, definitional heterogeneity and gaps in single-centre rehabilitation cohorts. Page 5. |
| Introduction | **3** | Objectives: State specific objectives, including any pre-specified hypotheses | Two pre-specified objectives stated at the end of the Introduction: (1) inpatient UTI incidence rate; (2) demographic/injury risk factors for UTI and systemic UTI. Page 6. |
| **Methods** | | | |
| Methods | **4** | Study design: Present key elements of study design early in the paper | Methods opens with study type (retrospective cohort) and notes STROBE adherence. Page 6. |
| Methods | **5** | Setting: Describe the setting, locations, and relevant dates, including periods of recruitment, exposure, follow-up, and data collection | Tertiary academic neurological rehabilitation department, Sheba Medical Center, Ramat-Gan, Israel. Discharge between 1 Jan 2012 and 31 Mar 2024. Page 6. |
| Methods | **6** | (a) Eligibility criteria, sources, methods of selection of participants. Describe methods of follow-up | Consecutive adults with SCI discharged in study window; first (index) admission per patient retained; exclusions: primary non-SCI diagnosis, admission <2 days. Follow-up is the inpatient rehabilitation episode. Page 6. |
|  |  | (b) For matched studies, give matching criteria and number of exposed and unexposed | Not applicable (not a matched cohort). |
| Methods | **7** | Variables: Clearly define all outcomes, exposures, predictors, potential confounders, and effect modifiers. Give diagnostic criteria, if applicable | Operational definitions of UTI-defining event, episode, systemic UTI, non-systemic UTI and recurrent UTI provided in Methods; baseline variables (age band, sex, etiology, neurological level, AIS grade, length of stay) listed. Page 6. |
| Methods | **8*** | Data sources/measurement: For each variable of interest, give sources of data and details of methods of assessment (measurement). Describe comparability of assessment methods if there is more than one group | EHR via MDClone ADAMS; cross-validated against departmental registry; AIS classification by treating rehabilitation physician on admission. Page 6. |
| Methods | **9** | Bias: Describe any efforts to address potential sources of bias | Selection bias minimised by consecutive sampling and pre-specified exclusion of secondary admissions; misclassification addressed via pyuria cutoff selection (Methods + Discussion); residual confounding acknowledged. Page 6-7 and 12-13. |
| Methods | **10** | Study size: Explain how the study size was arrived at | All eligible consecutive admissions in a 12-year window included; no a priori sample-size calculation as the study uses the full available cohort. Page 6. |
| Methods | **11** | Quantitative variables: Explain how quantitative variables were handled in the analyses. If applicable, describe which groupings were chosen and why | Age categorised a priori (<45, 45–64, ≥65); AIS dichotomised (A vs B–E); neurological level four-level. Justifications in Methods. Page 6. |
| Methods | **12** | (a) Statistical methods: Describe all statistical methods, including those used to control for confounding | Poisson regression with log(person-days) offset for crude IRRs; pre-specified multivariable model adjusting for age, sex, etiology, neurological level and AIS. Page 6-7. |
|  |  | (b) Describe any methods used to examine subgroups and interactions | No formal subgroup or interaction analyses pre-specified. Sensitivity discussion of stricter systemic-UTI definition presented in Discussion. |
|  |  | (c) Explain how missing data were addressed | Subgroups with missing or unclassifiable data excluded from corresponding strata (Table 2 footnote); patient-level bladder management data unavailable and addressed as limitation. Page 9, 13. |
|  |  | (d) If applicable, explain how loss to follow-up was addressed | Not applicable; inpatient episode used as observation window. |
|  |  | (e) Describe any sensitivity analyses | Sensitivity considerations for the systemic-UTI definition described in Discussion; formal sensitivity model planned as future work. Page 12. |
| **Results** | | | |
| Results | **13*** | (a) Participants: Report numbers of individuals at each stage of study—eg numbers potentially eligible, examined for eligibility, confirmed eligible, included in the study, completing follow-up, and analysed | 737 consecutive eligible patients with SCI admitted/discharged within window included; flow described in Methods and Results. Page 9. |
|  |  | (b) Give reasons for non-participation at each stage | Exclusions documented: primary non-SCI diagnosis; admission <2 days. Page 6. |
|  |  | (c) Consider use of a flow diagram | Figure 1 provides the operational case-definition flow; cohort selection narrative in Methods. |
| Results | **14*** | (a) Descriptive data: Give characteristics of study participants (eg demographic, clinical, social) and information on exposures and potential confounders | Baseline characteristics in Table 1 and described in Results. Page 9. |
|  |  | (b) Indicate number of participants with missing data for each variable of interest | Footnotes to Tables 1–3 indicate subgroups with missing/unclassifiable data. |
|  |  | (c) Summarise follow-up time (eg average and total amount) | Total of 71,959 person-days; mean length of stay 97.6 days. Page 9. |
| Results | **15*** | Outcome data: Report numbers of outcome events or summary measures over time | 633 UTI episodes; 417 systemic UTI; monthly counts/rates in Supplementary Tables S1–S2 and Supplementary Figures S1–S2. Page 9-10. |
| Results | **16** | (a) Main results: Give unadjusted estimates and, if applicable, confounder-adjusted estimates and their precision (eg 95% confidence interval). Make clear which confounders were adjusted for and why they were included | Crude and adjusted IRRs with 95% CIs and Wald P-values in Tables 2 and 3; confounders pre-specified from the SCI UTI literature. Page 9-10. |
|  |  | (b) Report category boundaries when continuous variables were categorized | Age <45, 45–64, ≥65 years; AIS A vs B–E; neurological level four-level. Page 6. |
|  |  | (c) If relevant, consider translating estimates of relative risk into absolute risk for a meaningful time period | Incidence rates per 1,000 person-days reported (Tables 2–3, Results). |
| Results | **17** | Other analyses: Report other analyses done—eg analyses of subgroups and interactions, and sensitivity analyses | Time-series goodness-of-fit (residual deviance) reported. Sensitivity considerations on systemic-UTI definition discussed. Page 10-11. |
| **Discussion** | | | |
| Discussion | **18** | Key results: Summarise key results with reference to study objectives | Opening paragraph of Discussion summarises overall and systemic UTI incidence and the three independent risk factors. Page 11. |
| Discussion | **19** | Limitations: Discuss limitations of the study, taking into account sources of potential bias or imprecision. Discuss both direction and magnitude of any potential bias | Detailed Strengths and Limitations section (bladder-method data absent; AIS dichotomy; sensitivity-dependent systemic-UTI definition; COVID-19 overlap; single-centre; residual misclassification). Page 14. |
| Discussion | **20** | Interpretation: Give a cautious overall interpretation of results considering objectives, limitations, multiplicity of analyses, results from similar studies, and other relevant evidence | Comparison with published cohorts; mechanistic interpretation of age and AIS effects; clinical implications. Page 12-13. |
| Discussion | **21** | Generalisability: Discuss the generalisability (external validity) of the study results | Generalisability addressed: applicable to comparable tertiary inpatient rehabilitation settings with prolonged stay; caution outside this context. Page 14. |
| **Other information** | | | |
| Other information | **22** | Funding: Give the source of funding and the role of the funders for the present study and, if applicable, for the original study on which the present article is based | Funding section: "This study did not receive any specific grant from funding agencies in the public, commercial or not-for-profit sectors." Page 19. |

**Items 8, 13, 14, and 15 should be given separately for cases and controls in case-control studies; for exposed and unexposed groups in cohort studies; or for all comparison groups in cross-sectional studies. In the present cohort, all patients were observed within a single inpatient SCI rehabilitation cohort, and these items are reported for the full cohort and within strata as appropriate.*

*The STROBE checklist is best used in conjunction with the STROBE Statement (www.strobe-statement.org), an evidence-based, minimum set of recommendations for reporting observational studies in epidemiology. The checklist is provided as a related manuscript file accompanying this submission.*
